# Supplementary material for: Modulation of Epithelial–Mesenchymal Transition Is a Possible Underlying Mechanism for Inducing Chemoresistance in MIA PaCa-2 Cells against Gemcitabine and Paclitaxel
Source: MDPI journal article supplement (doi:10.3390/biomedicines12051011), 2024-05-03
Supplement: s1 [file s1]

Fig. S1 M-A plot and volcano plot for MIA capa-2-PA vs -GR.

Fig S1. PA vs GR

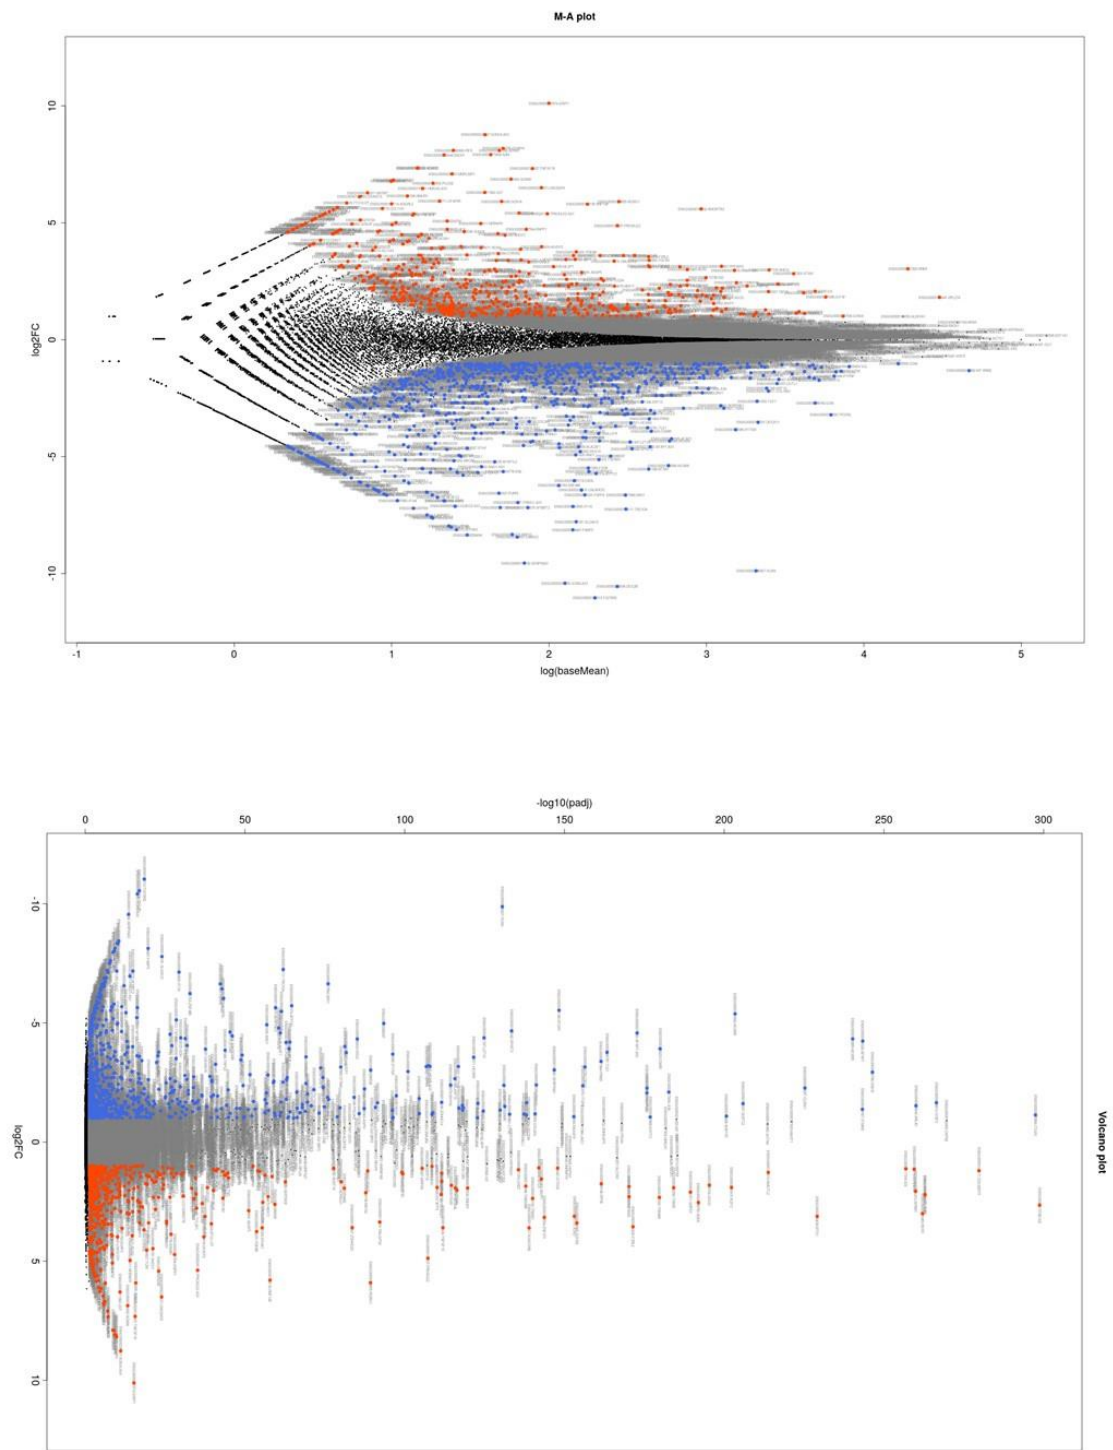

**Fig. S2 M-A plot and volcano plot for MIA capa-2-PA vs -PR**

Fig. S2. PA vs PR

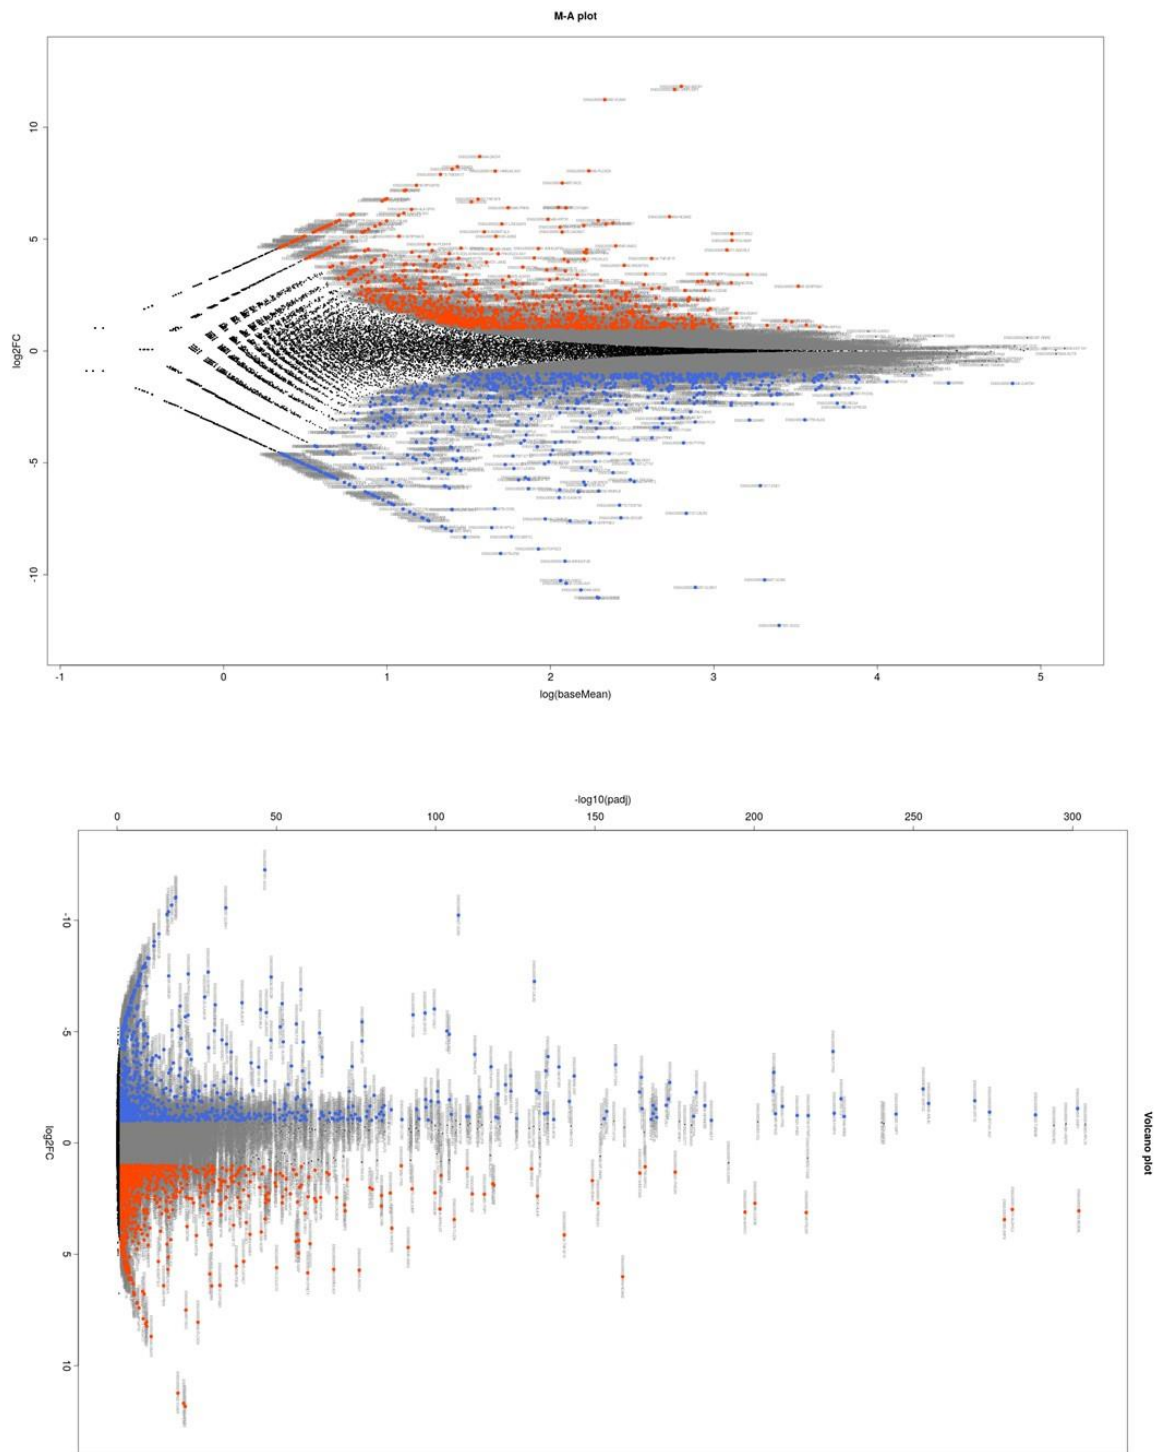

**Fig. S3 M-A plot and volcano plot for MIA capa-2-GR vs -PR**

Fig. S3. GR vs PR

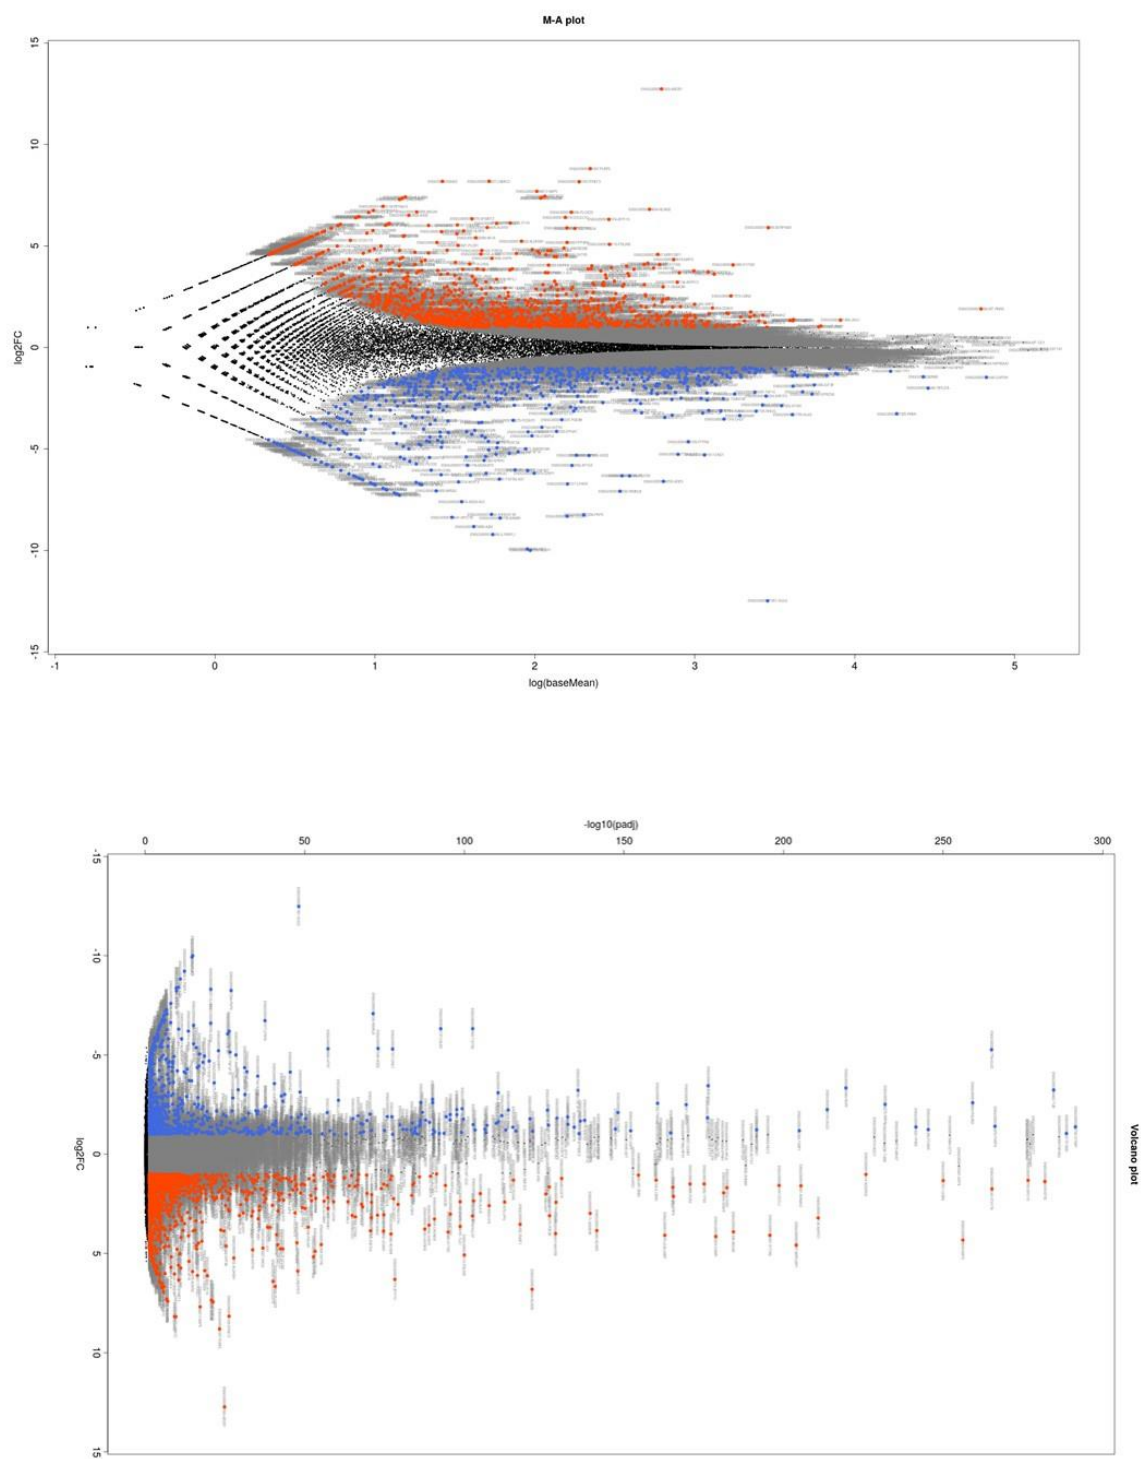

**Table S1 primers for qPCR**

Table S1. List of primers for qPCR.

|        |         |                          |
|--------|---------|--------------------------|
| STAT3  | Forward | CTTTGAGACCGAGGTGTATCACC  |
|        | Reverse | GGTCAGCATGTTGTACCACAGG   |
| GLI1   | Forward | AGCCTTCAGCAATGCCAGTGAC   |
|        | Reverse | GTCAGGACCATGCACTGTCTTG   |
| ZNF367 | Forward | GGACAGCTCAAAACACATCAGCG  |
|        | Reverse | TTCGGACAGTGGCGGTTTGCAT   |
| NKX3-2 | Forward | CCGCTTCCAAAGACCTAGAGGA   |
|        | Reverse | ACCGTCGTCCTCGGTCCTTGG    |
| ZIC2   | Forward | ACACAGGCGAGAAACCCTTCCC   |
|        | Reverse | ACTCACACTGGAACGGCTTCTC   |
| IFIT2  | Forward | GGAGCAGATTCTGAGGCTTTGC   |
|        | Reverse | GGATGAGGCTTCCAGACTCCAA   |
| HEY1   | Forward | TGTCTGAGCTGAGAAGGCTGGT   |
|        | Reverse | TTCAGGTGATCCACGGTCATCTG  |
| TAP1   | Forward | GCAGTCAACTCCTGGACCACTA   |
|        | Reverse | CAAGGTTCCCACTGCTTACAGC   |
| FBXL14 | Forward | TGTACGGCTGCACCCGAATCAC   |
|        | Reverse | CTTCCCCGAGTTCTCACAGTGA   |
| IQSEC3 | Forward | CAGCAAGAAGCAGTTCAACCGC   |
|        | Reverse | TCAATGAGCCGCTCCACCTTCT   |
| GASK1B | Forward | CATGAGTGGTCCAAGATGGCAC   |
|        | Reverse | ACACAGGCATCTTCCTTGCGAG   |
| SCN1A  | Forward | GGACTGTATGGAGGTTGCTGGT   |
|        | Reverse | GCAAGGTTGTCTGCACTAAATGAG |
